# Supplementary material for: The caseinolytic protease complex component CLPC1 in Arabidopsis maintains proteome and RNA homeostasis in chloroplasts
Source: PubMed Central journal article supplement (PMC6136230; doi:10.1186/s12870-018-1396-0), 2018-09-12
Supplement: 12870_2018_1396_MOESM1_ESM.pdf [file 12870_2018_1396_MOESM1_ESM.pdf]

1 **The caseinolytic protease complex component CLPC1 in Arabidopsis maintains proteome and**  
2 **RNA homeostasis in chloroplasts**

3 ShouDong Zhang<sup>1,2¶</sup>, Huoming Zhang<sup>2</sup>, Yiji Xia<sup>1,3¶</sup>, Liming Xiong<sup>2¶</sup>

4 <sup>1</sup> Department of Biology, Hong Kong Baptist University, Hong Kong; <sup>2</sup> Division of Biological and  
5 Environmental Sciences and Technology, King Abdullah University of Science and Technology (KAUST),  
6 Thuwal 23955-6900, Saudi Arabia; <sup>3</sup>Partner State Key Laboratory of Agrobiotechnology, Chinese  
7 University of Hong Kong, Hong Kong

8  
9 **Supplementary data**

10 Table S1. Proteases accumulation in seedlings of different genotypes

| proteases | accession   | 1st batch        |               |         | 2nd batch (2 biological replicates) |               |         | Nishimura et al (2013) |
|-----------|-------------|------------------|---------------|---------|-------------------------------------|---------------|---------|------------------------|
|           |             | 4-week-old (LD)  |               |         | 2-week-old (LD)                     |               |         | 6-week-old (SD)        |
| symbol    |             | <i>clpc1</i> /WS | $\Delta$ N/WS | CP/WS   | <i>clpc1</i> /WS                    | $\Delta$ N/WS | CP/WS   | <i>clpc1</i> -1/wt     |
| CLPP1     | ATCG00670.1 | 4.7±0.3          | 3.2±0.1       | 1.0±0.2 | 1.5±0.0                             | 1.2±0.2       | 1.0±0.0 | 1.2                    |
| CipR3     | AT1G09130.1 | 4.6±1.1          | 2.5±0.6       | 0.7±0.1 | 1.8±0.0                             | 1.4±0.1       | 0.7±0.2 | 1.4                    |
| CipT1     | AT4G25370.1 | 4.4±0.3          | 2.8±0.2       | 0.9±0.1 | 1.9±0.7                             | 1.2±0.4       | 1.0±0.0 | 2.1                    |
| CLPR1     | AT1G49970.1 | 4.1±1.5          | 2.3±0.5       | 0.9±0.1 | 2.3±0.9                             | 1.5±0.4       | 0.7±0.0 | 1.9                    |
| CLPC2     | AT3G48870.2 | 4.0±1.1          | 3.1±0.5       | 1.4±0.1 | 1.5±0.1                             | 1.7±0.0       | 0.8±0.0 | 2.5                    |
| CLPR2     | AT1G12410.1 | 3.8±0.3          | 2.7±0.1       | 0.8±0.1 | 2.4±0.7                             | 1.5±0.4       | 0.8±0.1 | 2.1                    |
| CLPP4     | AT5G45390.1 | 3.8±0.2          | 2.6±0.2       | 0.7±0.1 | 2.0±0.3                             | 1.6±0.3       | 0.7±0.1 | 1.3                    |
| CLPP6     | AT1G11750.1 | 3.4±0.3          | 2.9±0.3       | 0.9±0.1 | 1.7±0.5                             | 1.7±0.3       | 0.7±0.1 | 3.6                    |
| CLPP3     | AT1G66670.1 | 3.3±0.3          | 2.6±0.2       | 0.9±0.2 | 1.5±0.2                             | 1.3±0.1       | 0.7±0.3 | 1.0                    |
| CLPR4     | AT4G17040.1 | 3.1±1.0          | 2.0±0.4       | 0.9±0.1 | 2.0±0.2                             | 1.6±0.1       | 0.7±0.2 | 1.5                    |
| CipT2     | AT4G12060.1 | 3.0±0.2          | 2.1±0.1       | 0.9±0.1 | 1.9±0.2                             | 1.5±0.1       | 1.1±0.1 | 1.4                    |
| CLPB3     | AT5G15450.1 | 2.3±0.9          | 1.6±0.2       | 1.1±0.1 | 2.3±0.3                             | 1.5±0.1       | 0.7±0.0 | 3.4                    |
| PREP1     | AT3G19170.1 | 4.0±0.5          | 2.5±0.2       | 0.9±0.0 | 1.7±0.1                             | 1.7±0.1       | 0.6±0.0 | 1.8                    |
| DegP2     | AT2G47940.1 | 3.6±1.1          | 2.7±0.5       | 1.2±0.2 | 1.3±0.2                             | 1.4±0.2       | 1.0±0.3 | 2.5                    |
| LON       | AT1G75460.1 | 2.5±0.0          | 2.7±0.1       | 1.1±0.0 | 3.0±0.1                             | 2.3±0.1       | 1.3±0.1 | na                     |
| FTSH12    | AT1G79560.1 | 2.0±0.1          | 2.0±0.2       | 0.9±0.0 | 1.5±0.1                             | 1.9±0.0       | 1.1±0.0 | 1.2                    |
| AraSP     | AT2G32480.1 | 1.4±0.4          | 1.2±0.2       | 1.0±0.0 | 2.0±0.1                             | 1.6±0.2       | 1.1±0.1 | 1.4                    |
| DegP1     | AT3G27925.1 | 0.7±0.1          | 0.9±0.0       | 1.0±0.0 | 0.8±0.0                             | 0.8±0.0       | 1.2±0.1 | na                     |

11  
12 **Notes:**

- 13 1. WS: wild type; *clpc1*: the *clpc1* mutant;  $\Delta$ N, N-terminal (1-93 amino acid) deleted CLPC1  
14 complementary line; CP, full-length CLPC1 complementary line, LD, long-day; SD, short-day.  
15 2. The first batch dataset was from 4-week-old seedlings with three technical replicates. The second  
16 batch was from 2-week-old seedlings with two biological replicates and each biological replicate  
17 included 3 technical replicates.  
18 3. Data are means and standard errors of protein abundance relative to the wild type (WS).  
19 4. Data from Nishimura et al (2013) in [27].

20

21

Table S2. Primers used in the study.

|         |                            |
|---------|----------------------------|
| CLPC1-F | CAATCGACTCCACCGTCTTT       |
| CLPC1-R | TCCCATAAACCCCTTGCATTCT     |
| CLPC2-F | GAGGGTGTGTGATGAAGATGAG     |
| CLPC1-R | TGTCAGAAGAGGTGCTTGTA       |
| pClpP-F | CGACCCGATGTACAGACAATA      |
| pClpP-R | TAGCGTGAGGGAATGCTATAC      |
| ACT2-F  | TGCTTATGTCGCTCTTGACTAC     |
| ACT2-R  | CTCTCAGCTCCGATGGTTATG      |
| rbcL-F  | GTGTTGGGTTCAAAGCTGGT       |
| rbcL-R  | CATCGGGTCCACACAGTTGTC      |
| accD-F  | TGTGGATTCAATGCGACAAT       |
| accD-R  | TTTTGCGCAGAGTCAATACG       |
| atpA-F  | CGGAAATCTTACCTCGACCA       |
| atpA-R  | ATGGGTGACGGTTTGATGAT       |
| atpH-F  | ATCCACTGGTTTCTGCTGCT       |
| atpH-R  | TTCCTTCTGCCTCAGGTTGT       |
| atpI-F  | ATTGGCAAATAGGGGGTTTC       |
| atpI-R  | GCCGTCGATTGGAATTGTTT       |
| ccsA-F  | CACAATAACTGCGCCAAGTG       |
| ccsA-R  | AACAGAGCGCCATAGCCTAA       |
| cemA-F  | TTTGCCCTGGTTGATCTCTC       |
| cemA-R  | TTGGATCGTTTCTTTGTGGA       |
| ndhB-F  | CCAGAAGAAGATGCCATTCA       |
| ndhB-R  | TCATCAATGGACTCCTGACG       |
| ndhI-F  | TTTGCCCTGTTGTTGATTGGA      |
| ndhI-R  | ATTGGTAAACGACCCAAAGC       |
| petA-F  | CAGAGGGCGAATCCATTA         |
| petA-R  | GCCAAAACAACCGATCCTAA       |
| petB-F  | ATTGGGCGGTCAAAATTGTA       |
| petB-R  | AGACGGCCGTAAAGAAGAGGT      |
| psaA-F  | GCCAAGAAATCCTGAATGGA       |
| psaA-R  | CATCTTGAACCAAGCCAAT        |
| psaC-F  | GAGCATGCCCTACAGACGTA       |
| psaC-R  | CAGGCGGATTCACATCTCTT       |
| psbL-F  | CAATCAAATCCGAACGAACA       |
| psbL-R  | GAAATAATTCGAAAATAAAACAGCAA |
| rpl14-F | AGCGGGGCTAGAGAATTGAT       |
| rpl14-R | ACTGCGGCATTGTCATCATA       |
| rpl20-F | TCGGAGGCGTAGAACAAAAC       |
| rpl20-R | CGATGAGCCGAAACTAAAGC       |
| rpoA-F  | GCGATGCGAAGAGCTTTACT       |
| rpoA-R  | CCAGGACCTTGGACACAAAT       |
| rpoB-F  | AAAAAGCACGGATACGGATG       |
| rpoB-R  | CTTCTTGAATGCCCGATTA        |
| rpoC1-F | TCGGATACGAAGATATCAAATGG    |
| rpoC1-R | TTAGTTATGGGCCTAGCAAAAAGA   |

|            |                          |
|------------|--------------------------|
| rpoC2-F    | ATGGAGCCCGTAAAGGAGTT     |
| rpoC2-R    | CGTCTGCTAAGACACGACCA     |
| rpS18-F    | CAAGCGATCTTTTCGTAGGC     |
| rpS18-R    | AAAGCTCACTCTATTCACCCGTCT |
| ycf2-F     | TAGCCCTCGGTCTATTGGTG     |
| ycf2-R     | GGATCCACTTTTTGGGGAAT     |
| ycf3-F     | TCCAATACTCAGCGGCTTG      |
| ycf3-R     | TTCGGGCATTAGAACGAAAC     |
| ycf5-F     | GCGAACAACCGGAGCTATTA     |
| ycf5-R     | CCGACATGCGTATTTTTGATT    |
| 23s rRNA-F | GGGCGACTGTTTACCAAAAA     |
| 23s rRNA-R | TTACCCGACAAGGAATTTTCG    |
| 16s rRNA-F | CGGTATCTGGGGAATAAGCA     |
| 16s rRNA-R | GATTTGACGGCGGACTTAAA     |
| atpB-F     | CCGTTTCGTACAAGCAGGAT     |
| atpB-R     | CGGGGTCAGTCAAATCATCT     |
| atpE-F     | TCCACAAGAAGCTCAGCAAA     |
| atpE-R     | GTGTCCGAGCTCGTCTGAG      |
| atpF-F     | GCTCCTTCACGCAGTTCTTC     |
| atpF-R     | TACTTGGGTCACTGGCCATC     |
| matK-F     | ATCCTTTGTTGCCAGAATGC     |
| matK-R     | TTTTTCTACGCAAGCGGTCT     |
| ndhA-F     | TTGACGCCACAAATTCAT       |
| ndhA-R     | TTAGGTGGTCTGCGAGCTG      |
| ndhD-F     | TGGAGAATGGGAATAGATGGAC   |
| ndhD-R     | TCCCGAGAAGAAAATGATCCTA   |
| ndhK-F     | GCAGTCCGCATATTGGAAAT     |
| ndhK-R     | CGTGGGACGATACTGGACTT     |
| petD-F     | TCCTTTTGCAACTCCTTTGG     |
| petD-R     | CCGCTGGTACTGAAACCATT     |
| psaB-F     | GGACCCCACTACTCGTCGTA     |
| psaB-R     | ATTGCTAATTGCCCGAAATG     |
| psbA-F     | GAGCAGCAATGAATGCGATA     |
| psbA-R     | CCTATGGGGTCGCTTCTGTA     |
| psbB-F     | CGTGCGACTTTGAAATCTGA     |
| psbB-R     | TAGCACCATGCCAAATGTGT     |
| psbC-F     | ACTTCCCCACCTAGCCACTT     |
| psbC-R     | AGCCCAAACTGCAGAAGAA      |
| psbD-F     | CACAAATCTTTGGGGTTGCT     |
| psbD-R     | CCATCCAAGCACGAATACCT     |
| rpL16-F    | TGTACGACGTGGTGAAAA       |
| rpL16-R    | GCATTTTTGATGCCGCTATT     |
| rpL22-F    | AAAGCTGAGGTGAACCAAGG     |
| rpL22-R    | TGTCCCATAGGCCTCCACTA     |
| rpL32-F    | CTCGAAAAAGCGTATTCGTAAAA  |
| rpL32-R    | TGAAAAAGCTTTCAACGATGTC   |
| rpS2-F     | GGGCTCGGTGTCATTATGTT     |

rpS2-R TCTTCAACACAGCTGCATCC  
 rpS4-F CGATTGGGTATGGCTTTGAC  
 rpS4-R ATGGTTTGGCAATTCCTCAG  
 rpS8-F CGACCGGGTCTACGAATCTA  
 rpS8-R ATTTCTCCGCCGATTCTTTT  
 rpS14-F AATCCCCACCGCGTAATAGT  
 rpS14-R AACATGCCTGAACCATTTC

---

1

2

3 Table S3. Peptides identified of CLPC1 in SVR7-GFP CO-IP experiment

| accession No.<br>gene ID | Protein<br>name | probability | percentage of<br>total spectra | unique<br>spectra | total<br>spectra | Peptide<br>sequence | Mascot<br>Ion score | Modifications identified<br>by spectrum |
|--------------------------|-----------------|-------------|--------------------------------|-------------------|------------------|---------------------|---------------------|-----------------------------------------|
| AT5G50920.1              | ATHSP93-V       | 100.00%     | 0.16%                          | 4                 | 7                | HIEKDPALER          | 18.5                |                                         |
| AT5G50920.1              | ATHSP93-V       | 100.00%     | 0.16%                          | 4                 | 7                | HIEKDPALER          | 26.6                |                                         |
| AT5G50920.1              | ATHSP93-V       | 100.00%     | 0.16%                          | 4                 | 7                | RIIGQDEAVK          | 37.4                |                                         |
| AT5G50920.1              | ATHSP93-V       | 100.00%     | 0.16%                          | 4                 | 7                | RIIGQDEAVK          | 37.5                |                                         |
| AT5G50920.1              | ATHSP93-V       | 100.00%     | 0.16%                          | 4                 | 7                | VIMLAQEEAR          | 50.2                | Oxidation (+16)                         |
| AT5G50920.1              | ATHSP93-V       | 100.00%     | 0.16%                          | 4                 | 7                | VLENLGADPSNIR       | 30.4                |                                         |
| AT5G50920.1              | ATHSP93-V       | 100.00%     | 0.16%                          | 4                 | 7                | VLENLGADPSNIR       | 48.5                |                                         |

4

5

6

7

8

9

10

11

12

13

14

15

16

1 Figure S1. Relative expression levels of sense transcripts in the *clp1* mutant and its complementation  
 2 lines. Shown are means and SD from 3 replicates. qRT-PCR was conducted using gene-specific  
 3 primers (Table S2) normalized against the expression of the *ACT1N2* gene. WS, the wild type; *clp1*, the  
 4 *clp1* mutant;  $\Delta$ N-CP, *clp1* expressing N-terminus-truncated CLPC1; CP, *clp1* expressing the  
 5 full-length wild-type CLPC1.

**PEP (plastid encoded DNA-dependent RNA polymerase) genes relative transcript level**

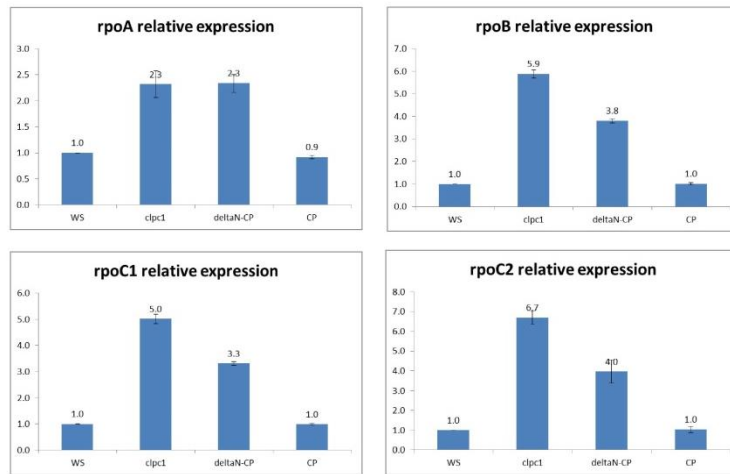

6

**Chloroplast encoded photosystem gene relative transcript level**

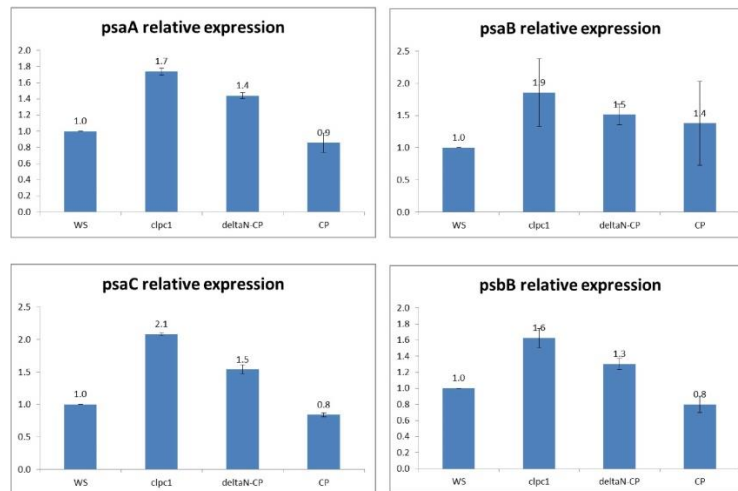

7

Other chloroplast encoded gene relative transcript level

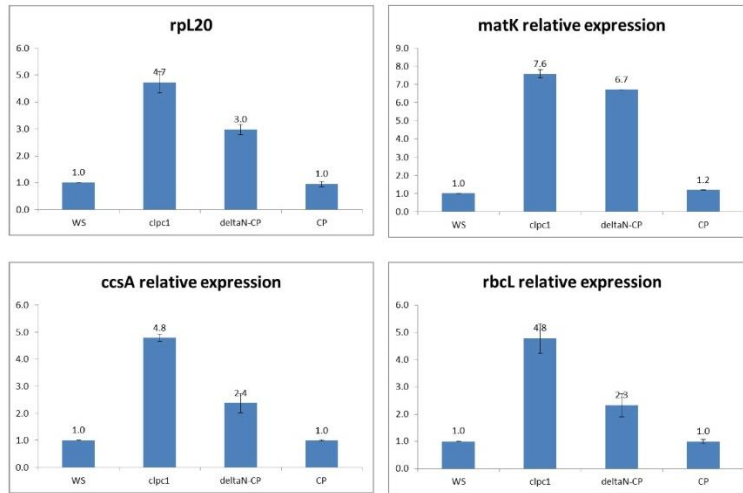

1

2 Figure S2. Over-expressing CLPC2 in *clp1* mutant partially or fully restored the chloroplast RNA level.

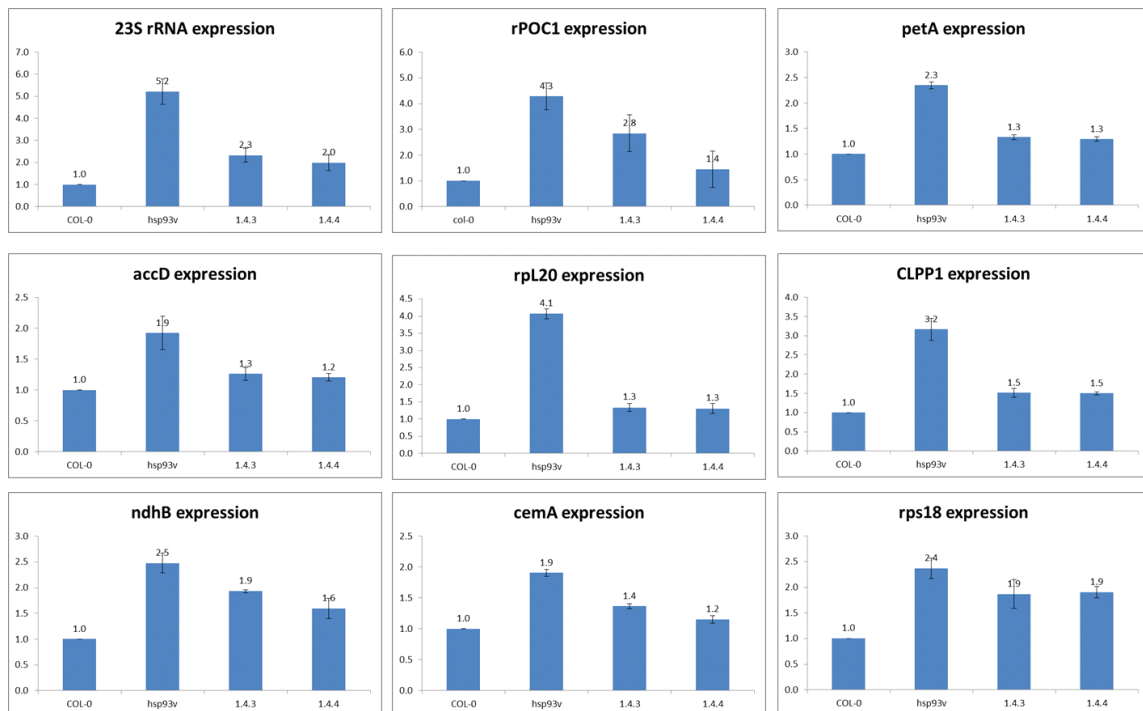

3

4

5

6

7

8

1 Figure S3. Schematic diagram to show the plant materials we used.

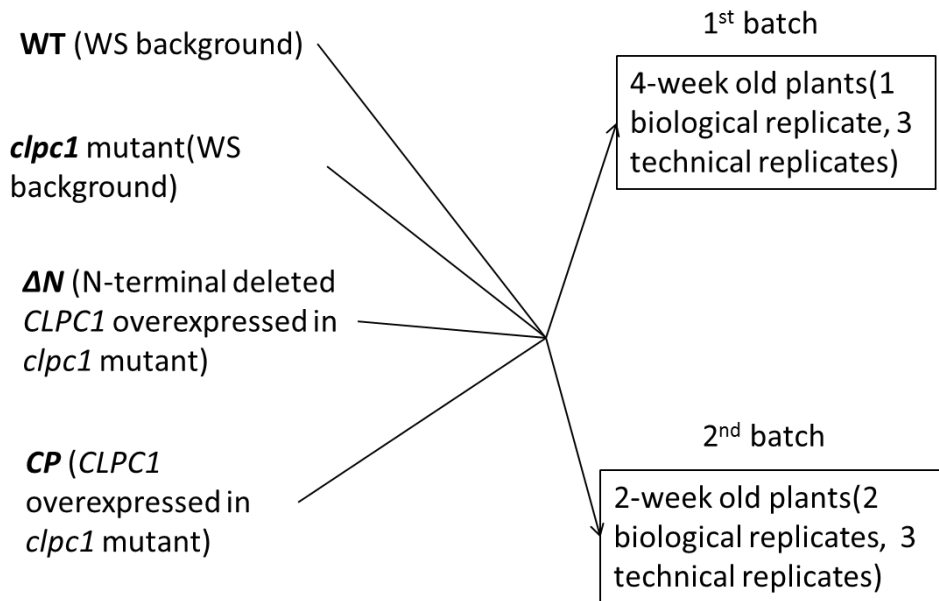

Note: Plant materials (all the plant materials used for proteomics are from Dr. Hsou-min Li (Chu & Li, 2012), and were grown at 21 degree with 16h light and 8h dark)

2

3 **Supplementary dataset 1. Spectral examples of 4 proteins from our iTRAQ-based**  
4 **proteomics analysis**

5 four proteins with each having two peptides and each peptide having two spectra (HCD and CID  
6 spectra) were shown below. The protein quantitation value was obtained by the weighted ratios  
7 of iTRAQ reporters from all identified peptides that belonged to the protein (enlarged iTRAQ  
8 reporter region was shown in the first spectral).

9

10 1. AT3G53700.1 [| Symbols: MEE40 | Pentatricopeptide repeat (PPR) superfamily protein |

11 a) Matched peptides: **ENQVEEATELAR**

1 HCD-spectral matched to TAIR10 database with iTRAQ reporter region (zoom in)

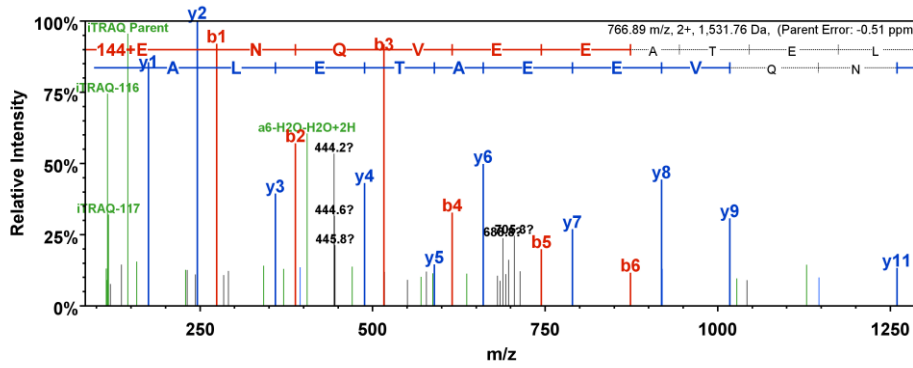

2

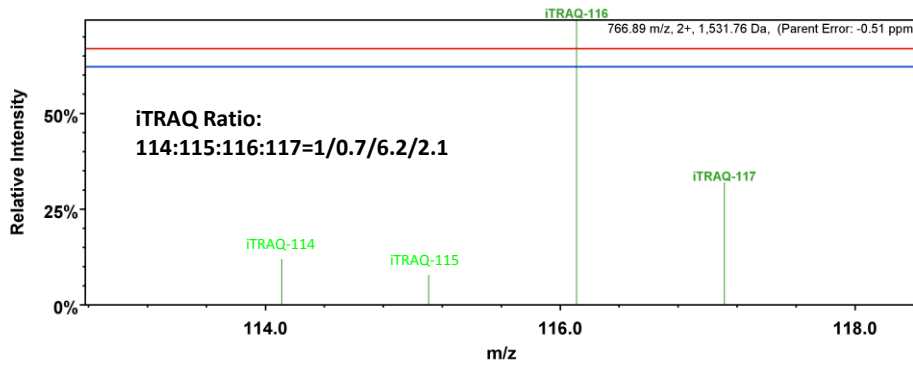

3

4 CID-spectral matched to TAIR10 database

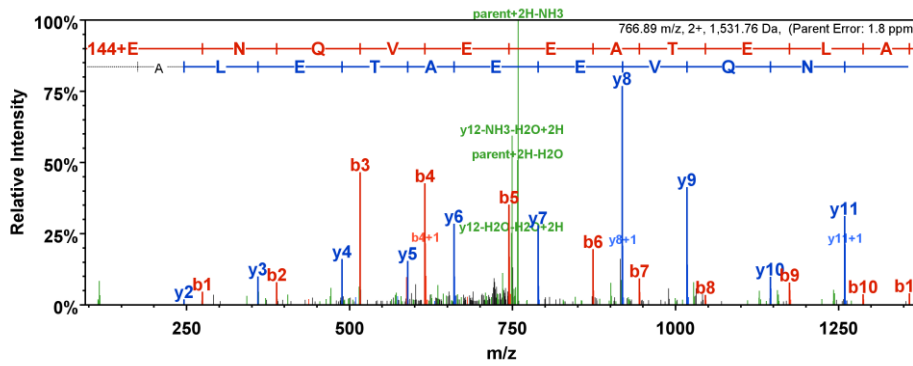

5

6 b) Matched peptides: **SQPDDSAALR**



1

### HCD-spectral matched to TAIR10 database

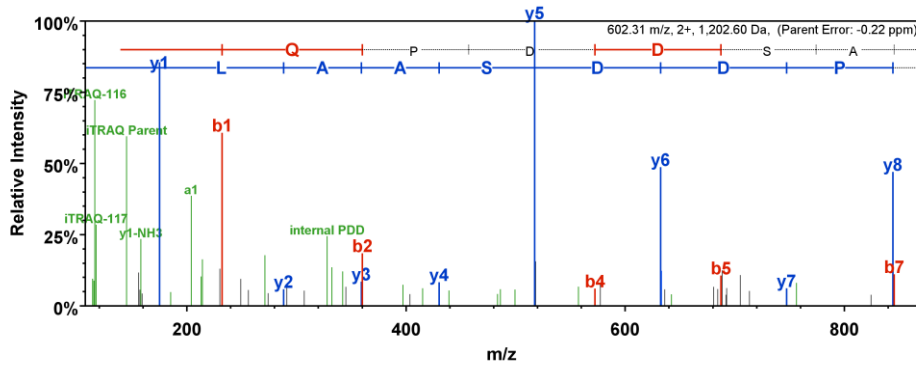

2

3

### CID-spectral matched to TAIR10 database

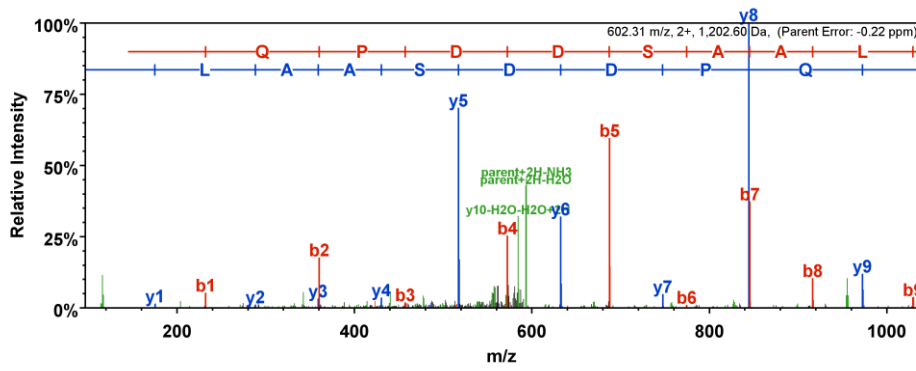

4

5

1 2. AT4G16390.1 || Symbols: SVR7 | pentatricopeptide (PPR) repeat-containing protein

2 a) Matched peptides: **EVILYNVTMK**

3 HCD-spectral matched to TAIR10 database

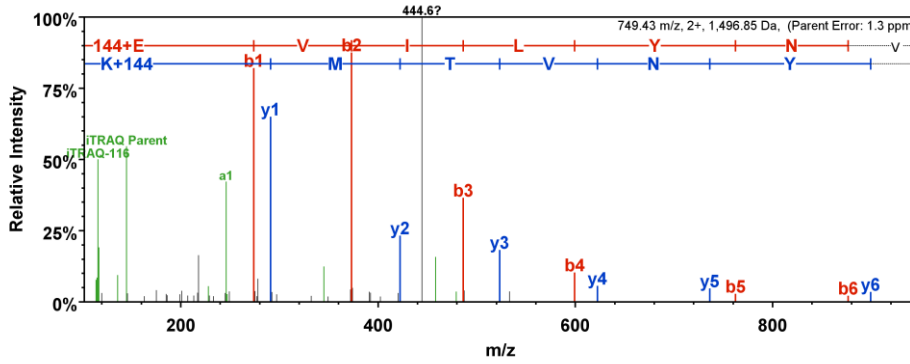

4

5 CID-spectral matched to TAIR10 database

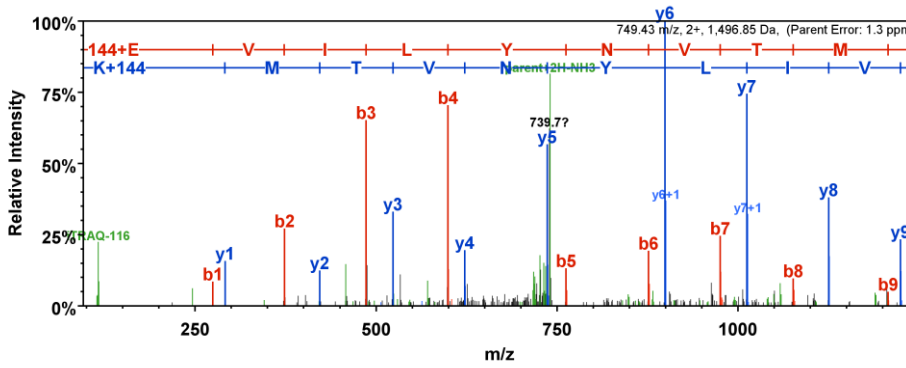

6

7

1 b) Matched peptides: **YGDDALAIYR**

2 HCD-spectral matched to TAIR10 database

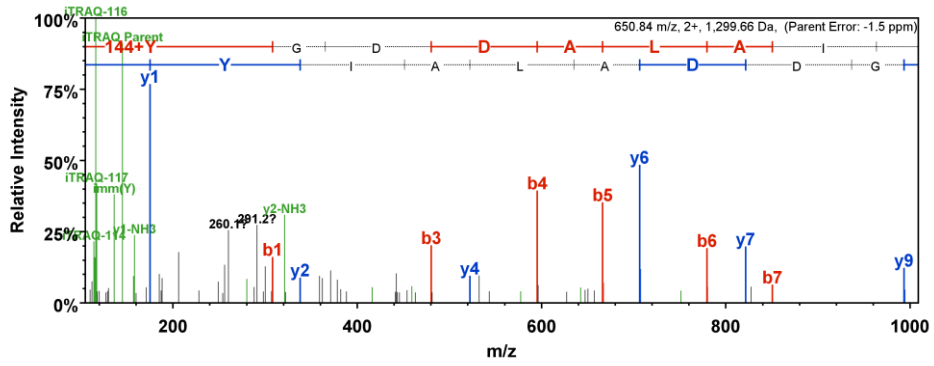

3

4 CID-spectral matched to TAIR10 database

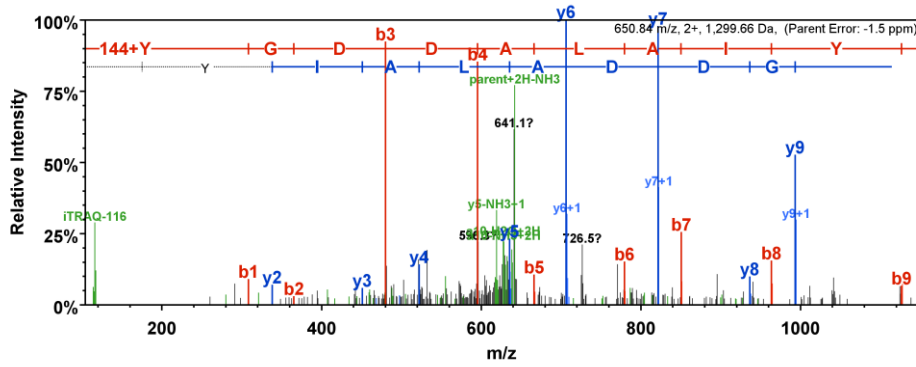

5

6

7

1 3. ATCG01060.1 [ | Symbols: PSAC | iron-sulfur cluster binding;electron carriers;4 iron, 4 sulfur  
2 cluster binding

3 a) Matched peptide: **IYDTCIGCTQCVR**

4 HCD-spectral matched to TAIR10 database

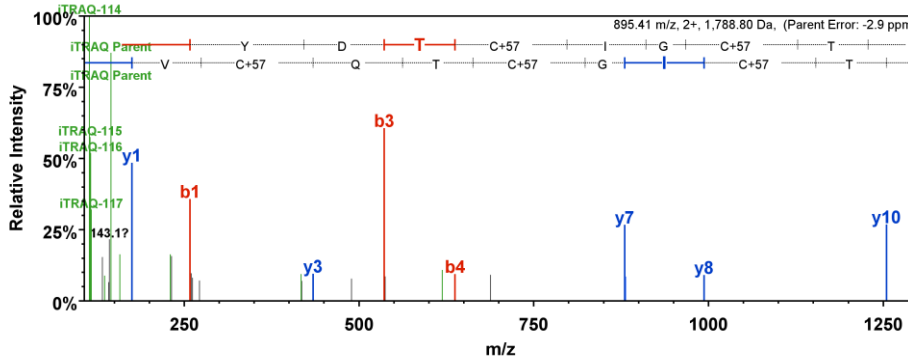

5

6 CID-spectral matched to TAIR10 database

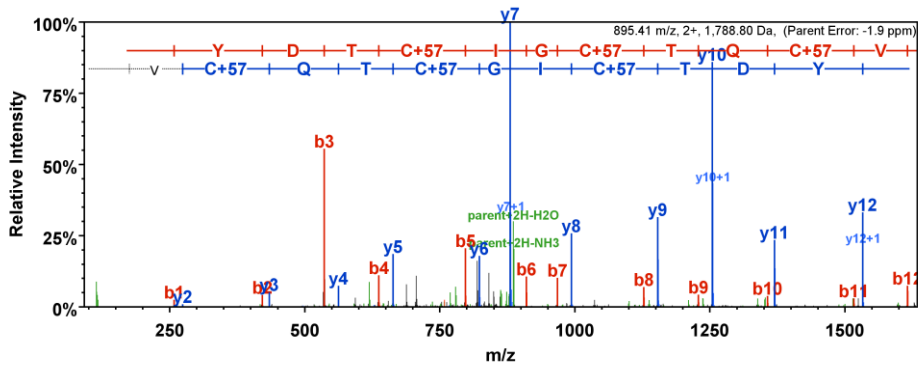

7

8

1 b) Matched peptide: **ACPTDVLEMIPWDGCK**

2 CID-spectral matched to TAIR10 database (HCD spectral is poor so no match to

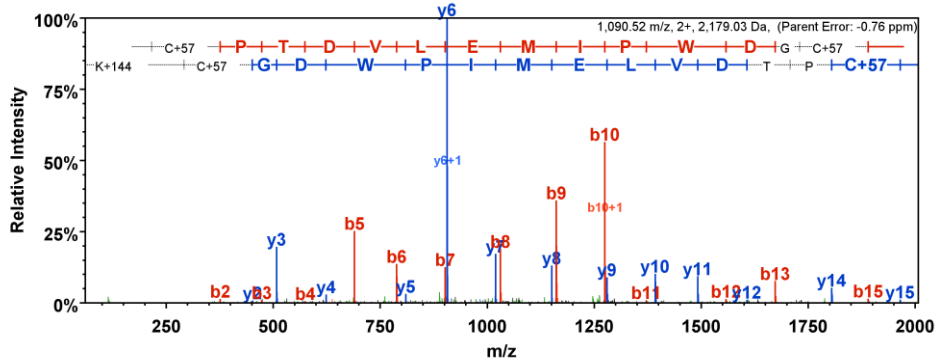

3 database)

4 c) Matched peptide: **CESACPTDFLSVR**

5 HCD-spectral matched to TAIR10 database

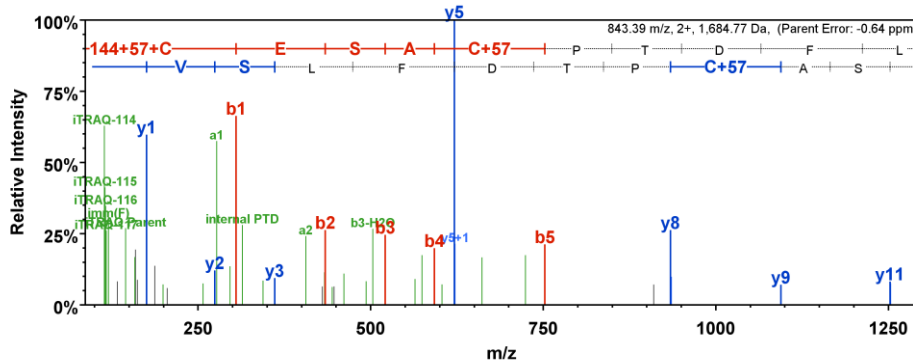

6

7 CID-spectral matched to TAIR10 database

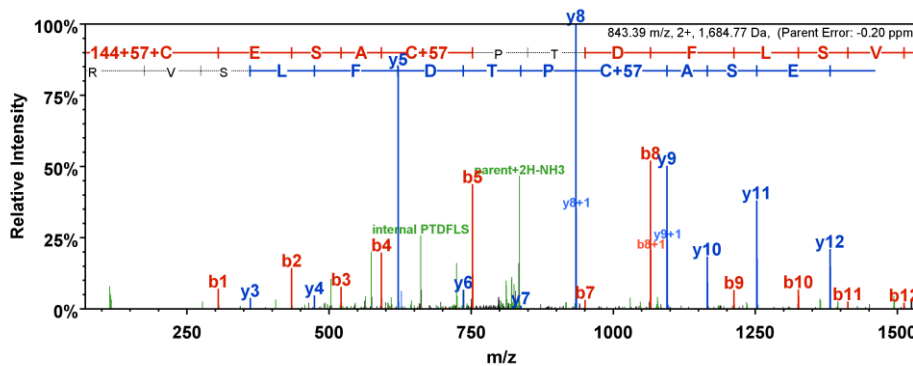

8

9

10

11

1 4. ATCG00020.1 [| Symbols: PSBA | photosystem II reaction center protein A

2 a) Matched peptide: **ETTENESANEGYR**

3 HCD-spectral matched to TAIR10 database

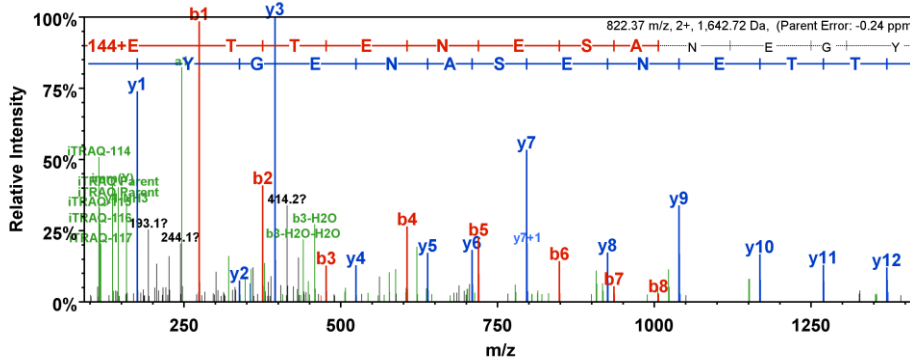

4

5 CID-spectral matched to TAIR10 database

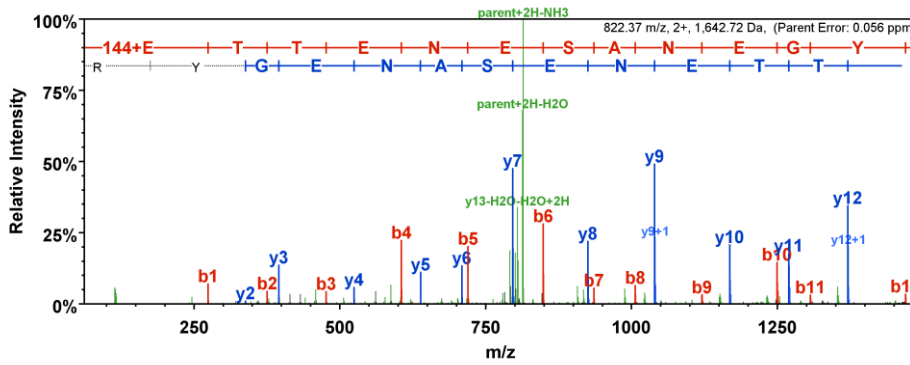

6

7

1 b) Matched peptide: **LIFQYASFNNSR**

2 HCD-spectral matched to TAIR10 database

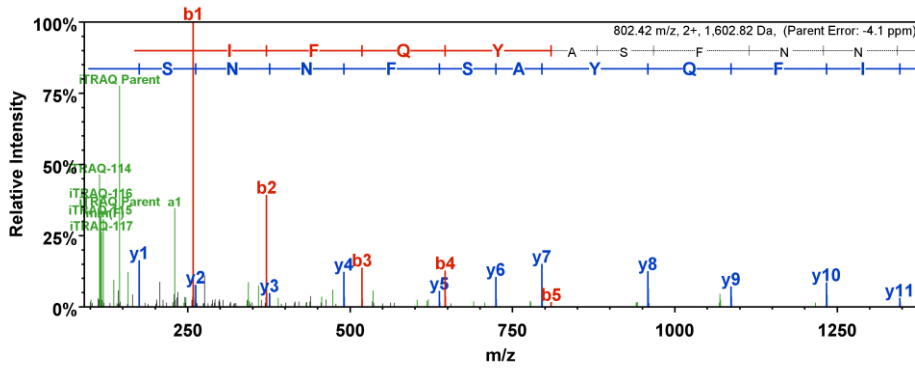

3

4 CID-spectral matched to TAIR10 database

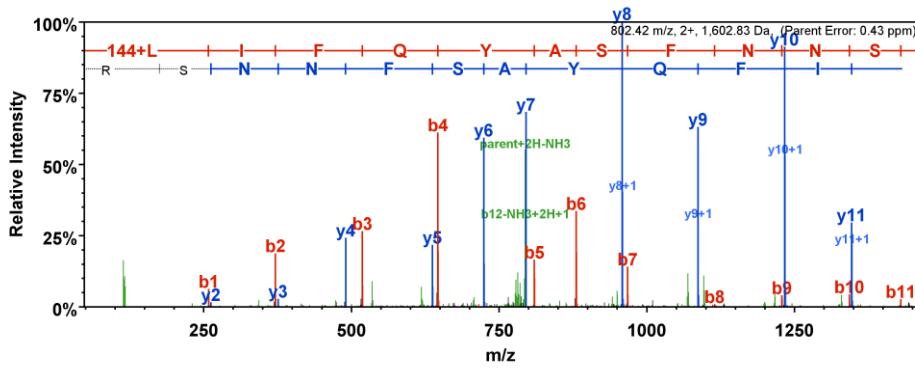

5

6

7

8

9

10

11
